# Supplementary material for: Direct conversion of syngas to aromatics via a two-stage C–C coupling over MnZr/HZSM-5 bifunctional catalysts employing OX-ZEO strategy
Source: Royal Society of Chemistry journal article supplement (doi:10.1039/d4cy01388c), 2024-12-05
Supplement: d4cy01388c1.pdf [file d4cy01388c1.pdf]

# **Direct conversion of syngas to aromatics with two step C-C coupling over MnZr/H-ZSM-5 bifunctional catalyst of OX-ZEO strategy**

Shiyu Liu<sup>1</sup>, Qiuyun Huang<sup>1</sup>, Ijaz Ul Haq<sup>1</sup>, Zixu Yang<sup>1</sup>, Weihua Shen<sup>1,\*</sup> and Yunjin Fang<sup>1,\*</sup>

1. State Key Laboratory of Chemical Engineering, School of Chemical Engineering,  
East China University of Science and Technology, Shanghai 200237, China

\*Corresponding Author

Email: [whshen@ecust.edu.cn](mailto:whshen@ecust.edu.cn)(Prof. Shen); [yjfang@ecust.edu.cn](mailto:yjfang@ecust.edu.cn)(Prof. Fang)

Tel: +86-21-64252829

## **Content**

1. Characterization Results
2. Additional reaction results and products distribution
3. Scheme of reaction mechanism over oxides

Reference

## 1. Characterization results

Table S1 Composites of fresh oxides and zeolites by XRF

| Entry | Sample           | Mn (mol%) | Zr (mol%) | Si (mol%) | Al (mol%) | Si/Al ratio |
|-------|------------------|-----------|-----------|-----------|-----------|-------------|
| 1     | MnO <sub>x</sub> | 100       | 0         |           |           |             |
| 2     | 8Mn2Zr           | 78.89     | 21.11     |           |           |             |
| 3     | 6Mn4Zr           | 59.35     | 40.65     |           |           |             |
| 4     | 4Mn6Zr           | 36.50     | 63.50     |           | /         |             |
| 5     | 2Mn8Zr           | 19.73     | 80.27     |           |           |             |
| 6     | ZrO <sub>2</sub> | 0         | 100       |           |           |             |
| 7     | H-ZSM-5(30)      |           |           | 97.07%    | 2.93%     | 33.12       |
| 8     | H-ZSM-5(60)      |           | /         | 98.32%    | 1.68%     | 58.52       |
| 9     | H-ZSM-5(120)     |           |           | 99.16%    | 0.84%     | 118.05      |
| 10    | H-ZSM-5(200)     |           |           | 99.47%    | 0.53%     | 187.68      |

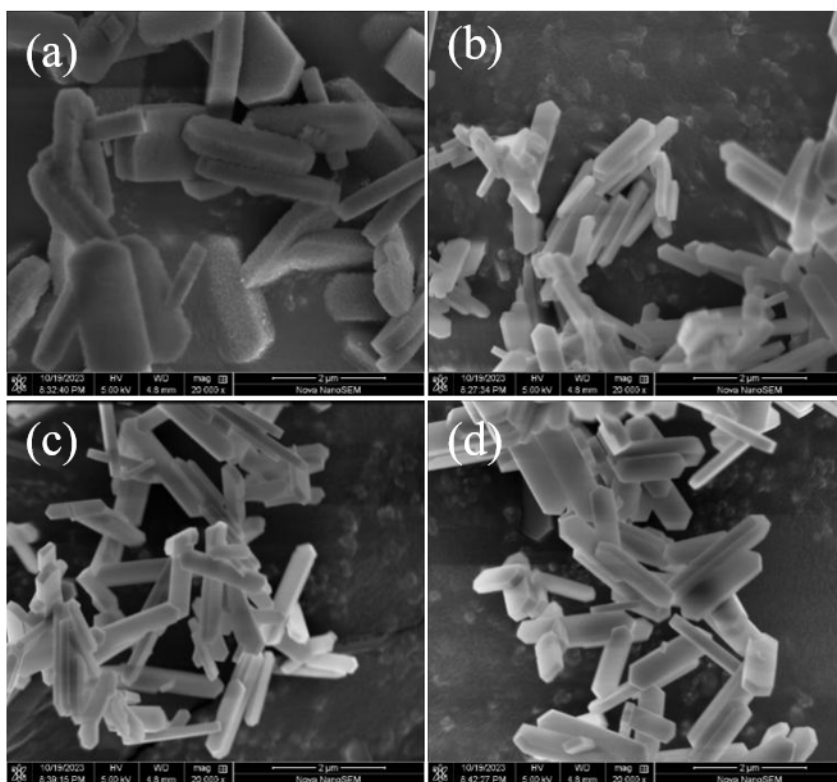

Figure S1 SEM figures of HZSM-5 with different Si/Al ratio (a) 30; (b) 60; (c) 120; (d) 200.

Table S2 Crystal size (nm) of oxides calculated by Scherrer equation.

| Sample              | Mn <sub>2</sub> O <sub>3</sub> | MnO  | <i>m</i> -ZrO <sub>2</sub> | <i>t</i> -ZrO <sub>2</sub> | Mn <sub>0.2</sub> Zr <sub>0.8</sub> O <sub>1.8</sub> |
|---------------------|--------------------------------|------|----------------------------|----------------------------|------------------------------------------------------|
| MnO <sub>x</sub> *  | 32.9                           |      | /                          | /                          | /                                                    |
| 8Mn2Zr*             | 28.6                           |      | /                          | /                          | 10.4                                                 |
| 6Mn4Zr*             | 27.0                           |      | /                          | /                          | 9.9                                                  |
| 4Mn6Zr*             | 26.3                           | /    | /                          | /                          | 9.6                                                  |
| 2Mn8Zr*             | /                              |      | /                          | /                          | 12.3                                                 |
| ZrO <sub>2</sub> *  | /                              |      | 11.0                       | 15.9                       | /                                                    |
| MnO <sub>x</sub> ** |                                | 44.7 |                            |                            | /                                                    |
| 8Mn2Zr**            |                                | 29.6 |                            |                            | 10.8                                                 |
| 6Mn4Zr**            |                                | 29   |                            | /                          | 10                                                   |
| 4Mn6Zr**            | /                              | 27.0 |                            |                            | 10.4                                                 |
| 2Mn8Zr**            |                                | /    |                            |                            | 13.5                                                 |
| ZrO <sub>2</sub> ** |                                | /    | 13.4                       | /                          | /                                                    |

\*\* Obtained from the fresh oxide patterns (figure 1b).

\* Obtained from the spent bifunctional catalyst patterns (figure 1d).

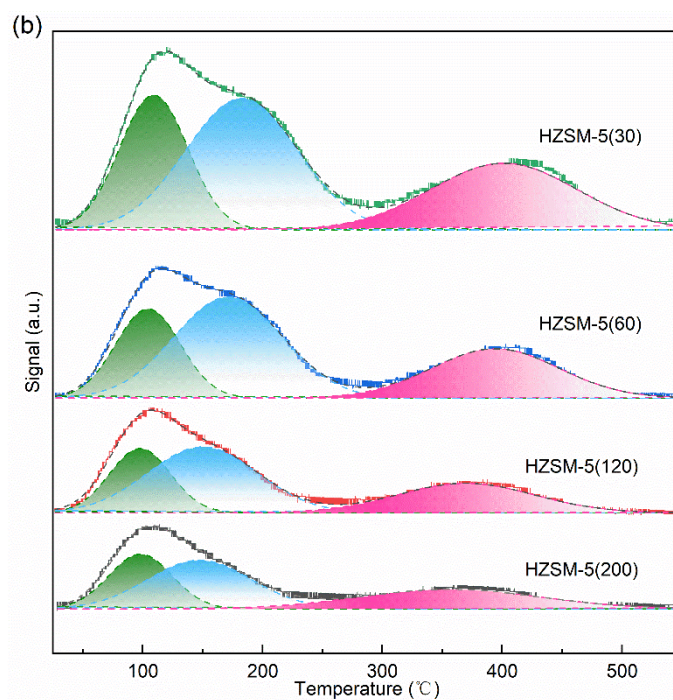

Figure S2 NH<sub>3</sub>-TPD profile of H-ZSM-5 with different Si/Al ratio.

Table S3 Quantification of acid density over HZSM-5 with different Si/Al ratio (from figure S2)

| Si/Al ratio | Acid sites distribution |                          |                   | Total acid sites<br>μmol/g |
|-------------|-------------------------|--------------------------|-------------------|----------------------------|
|             | Weak acid sites         | Medium strong acid sites | Strong acid sites |                            |
| 30          | 63.97%                  | 27.93%                   | 8.09%             | 142.04                     |
| 60          | 62.26%                  | 29.63%                   | 8.11%             | 73.45                      |
| 120         | 62.41%                  | 29.71%                   | 7.88%             | 42.54                      |
| 200         | 64.85%                  | 27.24%                   | 7.91%             | 35.76                      |

Table S4 Quantification oxides O 1s orbit with different composition (from figure 2b)

| Oxides           | Lattice O ( $O_L$ ) | Vacancy O ( $O_V$ ) | Chemi-sorbed O ( $O_C$ ) |
|------------------|---------------------|---------------------|--------------------------|
| MnO <sub>x</sub> | 70.77%              | 13.55%              | 15.68%                   |
| 8Mn2Zr           | 68.57%              | 19.32%              | 12.11%                   |
| 6Mn4Zr           | 71.96%              | 20.38%              | 7.66%                    |
| 4Mn6Zr           | 62.78%              | 21.00%              | 16.23%                   |
| 2Mn8Zr           | 58.34%              | 28.12%              | 13.54%                   |
| ZrO <sub>2</sub> | 66.31%              | 22.82%              | 10.87%                   |

Table S5 Quantification oxides Mn 2p orbit with different composition (from figure 2c)

| Oxides           | Mn <sup>2+</sup> | Mn <sup>3+</sup> |
|------------------|------------------|------------------|
| MnO <sub>x</sub> | 37.08%           | 62.92%           |
| 8Mn2Zr           | 46.05%           | 53.95%           |
| 6Mn4Zr           | 51.46%           | 48.54%           |
| 4Mn6Zr           | 54.29%           | 45.71%           |
| 2Mn8Zr           | 59.30%           | 40.70%           |

Table S6 Analysis of in-situ diffuse reflectance infrared spectroscopy (DRIFTS) adsorption peaks

| Mode                                              | Wavenumber (cm <sup>-1</sup> ) | From species         | Reference wavenumber (cm <sup>-1</sup> ) | Reference |
|---------------------------------------------------|--------------------------------|----------------------|------------------------------------------|-----------|
| $\nu(\text{OH})$                                  | 3754                           | Terminal surface -OH | 3770                                     | [1]       |
| $\nu(\text{OH})$                                  | 3687                           | Methanol             | /                                        | /         |
| $\nu(\text{OH})$                                  | 3658                           | Bridged surface -OH  | 3668                                     | [1]       |
| $\nu(\text{OH})$                                  | 3582                           | Ethanol              | 3000-3700                                | [2]       |
| $\nu_{\text{as}}(\text{CH}_3)$                    | 3009                           | Methyl               | 3005                                     | [3]       |
| $\nu_{\text{as}}(\text{CH}_3)$                    | 2973                           | Ethoxyl              | 2970                                     | [2, 4]    |
| $\delta(\text{CH}) + \nu_{\text{as}}(\text{OCO})$ | 2959                           | Formate              | 2965                                     | [5]       |
| $\nu_{\text{as}}(\text{CH}_3)$                    | 2929                           | Methoxyl             | 2930/2922/2923                           | [2, 3, 5] |
| $\nu_{\text{as}}(\text{CH}_2)$                    | 2877                           | Ethoxyl              | 2875                                     | [2]       |
| $\nu(\text{CH})$                                  | 2856                           | Formate              | 2855                                     | [4]       |
| $\nu_{\text{s}}(\text{CH}_3)$                     | 2814                           | Methanol             | 2820                                     | [3, 5]    |
| $\delta(\text{CH}) + \nu_{\text{s}}(\text{OCO})$  | 2739                           | Formate              | 2751                                     | [5]       |
| $\delta(\text{CH}) + \nu_{\text{s}}(\text{OCO})$  | 2713                           | Formate              | 2737                                     | [5]       |
| $\nu(\text{C}=\text{O})$                          | 1748                           | Formyl               | 1756                                     | [6]       |
| $\nu(\text{C}=\text{O})$                          | 1675/1698                      | Alkyl-aldehyde       | 1650-1700                                | [2]       |
| $\nu_{\text{as}}(\text{OCO})$                     | 1600                           | Formate              | 1593                                     | [7]       |
| $\nu_{\text{as}}(\text{OCO})$                     | 1583                           | Formate              | 1581/1560                                | [5]       |
| $\nu_{\text{as}}(\text{OCO})$                     | 1566                           | Carbonate            | 1563                                     | [7]       |
| $\nu_{\text{as}}(\text{OCO})$                     | 1549                           | Acetate              | 1547/1545                                | [2]       |
| $\nu_{\text{s}}(\text{OCO})$                      | 1437                           | Carbonate            | 1426                                     | [7]       |
| $\nu(\text{terminal-CO})$                         | 1142                           | Methoxyl             | 1149/1154                                | [5, 8]    |
| $\nu(\text{CO})$                                  | 1066                           | Ethoxyl              | 1065                                     | [2]       |
| $\nu(\text{bridged-CO})$                          | 1042                           | Methoxyl             | 1047/1043/1052                           | [5, 8]    |
| $\nu(\text{CO})$                                  | 1017                           | Methoxyl             | /                                        | /         |

The peak at 3687 cm<sup>-1</sup> appeared only at H<sub>2</sub> abundant environment; moreover, the strength was relative strong, thus we ascribed this peak as the adsorption of  $\nu(\text{OH})$  of hydrogen-bonded methanol which was similar with reference [2]. The peak at 1017 cm<sup>-1</sup> should be the adsorption peak of  $\nu(\text{CO})$ , as it appeared and increased during CO adsorption, it was supposed relative to methoxyl groups with higher coordination.



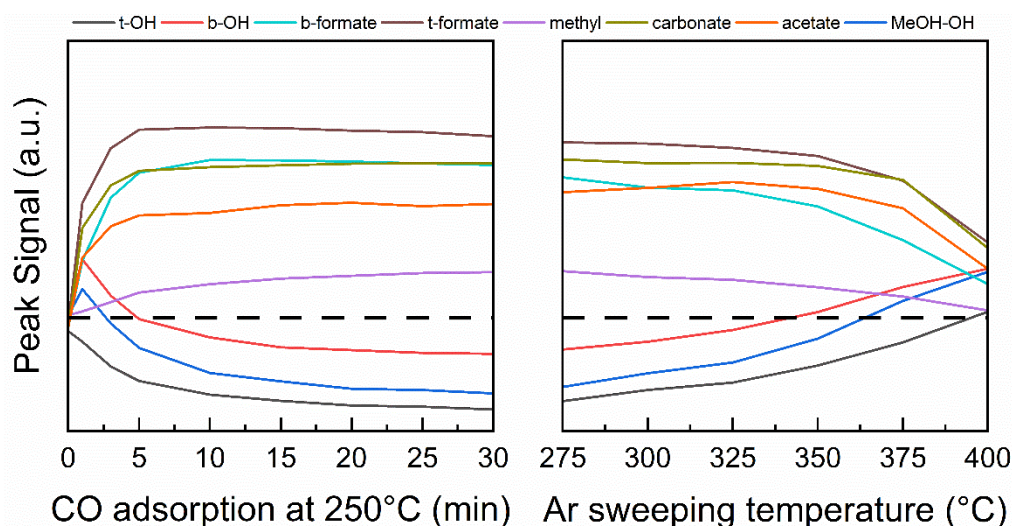

Figure S3. Peak signal of surface species in Figure 3(a).

t-OH ( $3754\text{ cm}^{-1}$ ,  $\nu(\text{OH})$ ), b-OH ( $3658\text{ cm}^{-1}$ ,  $\nu(\text{OH})$ ), b-formate ( $1600\text{ cm}^{-1}$ ,  $\nu_{\text{as}}(\text{OCO})$ ), t-formate ( $1583\text{ cm}^{-1}$ ,  $\nu_{\text{as}}(\text{OCO})$ ), methyl ( $3009\text{ cm}^{-1}$ ,  $\nu_{\text{as}}(\text{CH})$ ), carbonate ( $1566\text{ cm}^{-1}$ ,  $\nu_{\text{as}}(\text{OCO})$ ), acetate ( $1549\text{ cm}^{-1}$ ,  $\nu_{\text{as}}(\text{OCO})$ ), MeOH-OH ( $3687\text{ cm}^{-1}$ ,  $\nu(\text{OH})$ )

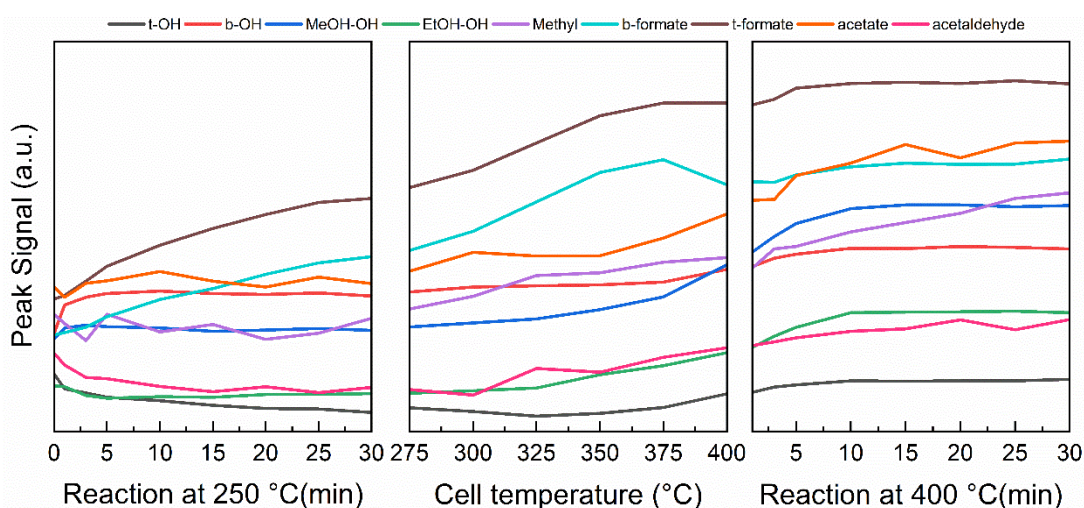

Figure S4. Peak signal of surface species in Figure 3(b).

\*Methyl group signal was multiplied by 10 to enhance the trend

t-OH ( $3754\text{ cm}^{-1}$ ,  $\nu(\text{OH})$ ), b-OH ( $3658\text{ cm}^{-1}$ ,  $\nu(\text{OH})$ ), MeOH-OH ( $3687\text{ cm}^{-1}$ ,  $\nu(\text{OH})$ ), EtOH-OH ( $3582\text{ cm}^{-1}$ ,  $\nu(\text{OH})$ ), methyl ( $3009\text{ cm}^{-1}$ ,  $\nu_{\text{as}}(\text{CH})$ ), b-formate ( $1600\text{ cm}^{-1}$ ,  $\nu_{\text{as}}(\text{OCO})$ ), t-formate ( $1583\text{ cm}^{-1}$ ,  $\nu_{\text{as}}(\text{OCO})$ ), acetate ( $1549\text{ cm}^{-1}$ ,  $\nu_{\text{as}}(\text{OCO})$ ), acetaldehyde ( $1675\text{ cm}^{-1}$ ,  $\nu(\text{C}=\text{O})$ )

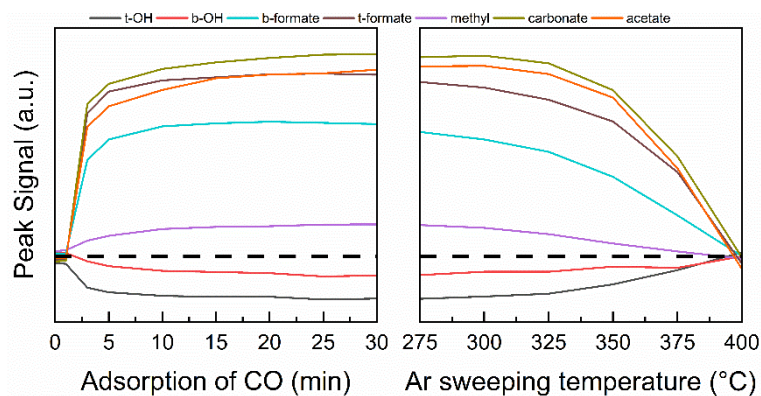

Figure S5. Peak signal of surface species in Figure 4(a).

t-OH ( $3754\text{ cm}^{-1}$ ,  $\nu(\text{OH})$ ), b-OH ( $3658\text{ cm}^{-1}$ ,  $\nu(\text{OH})$ ), b-formate ( $1600\text{ cm}^{-1}$ ,  $\nu_{\text{as}}(\text{OCO})$ ), t-formate ( $1583\text{ cm}^{-1}$ ,  $\nu_{\text{as}}(\text{OCO})$ ), methyl ( $3009\text{ cm}^{-1}$ ,  $\nu_{\text{as}}(\text{CH})$ ), carbonate ( $1566\text{ cm}^{-1}$ ,  $\nu_{\text{as}}(\text{OCO})$ ), acetate ( $1549\text{ cm}^{-1}$ ,  $\nu_{\text{as}}(\text{OCO})$ )

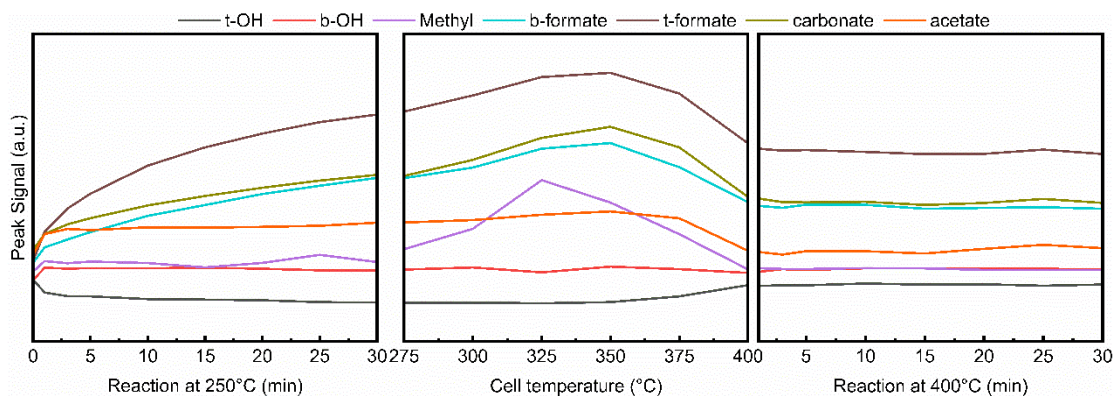

Figure S6. Peak signal of surface species in Figure 4(b).

\*Methyl group signal was multiplied by 10 and acetate group signal was multiplied by 2 to enhance the trend  
 t-OH ( $3754\text{ cm}^{-1}$ ,  $\nu(\text{OH})$ ), b-OH ( $3658\text{ cm}^{-1}$ ,  $\nu(\text{OH})$ ), methyl ( $3009\text{ cm}^{-1}$ ,  $\nu_{\text{as}}(\text{CH})$ ), b-formate ( $1600\text{ cm}^{-1}$ ,  $\nu_{\text{as}}(\text{OCO})$ ), t-formate ( $1583\text{ cm}^{-1}$ ,  $\nu_{\text{as}}(\text{OCO})$ ), carbonate ( $1566\text{ cm}^{-1}$ ,  $\nu_{\text{as}}(\text{OCO})$ ), acetate ( $1549\text{ cm}^{-1}$ ,  $\nu_{\text{as}}(\text{OCO})$ )

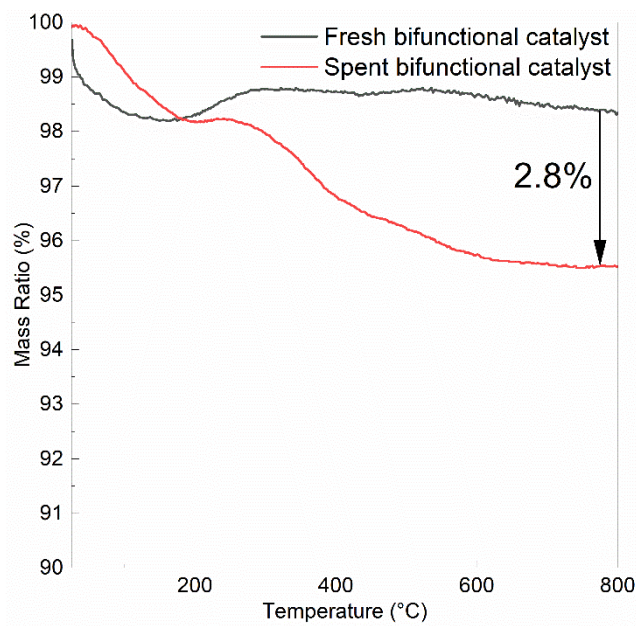

Figure S7 TG profile of bifunctional catalysts. (The fresh catalyst was pre-reduced with same procedure in catalyst evaluation section)

Table S7 Analysis of N<sub>2</sub> isothermal adsorption.

| Sample                       | S <sub>BET</sub><br>(m <sup>2</sup> /g) <sup>a</sup> | S <sub>micro</sub><br>(m <sup>2</sup> /g) <sup>b</sup> | V <sub>total</sub><br>(cm <sup>3</sup> /g) <sup>c</sup> | V <sub>micro</sub><br>(cm <sup>3</sup> /g) <sup>b</sup> |
|------------------------------|------------------------------------------------------|--------------------------------------------------------|---------------------------------------------------------|---------------------------------------------------------|
| Fresh bifunctional catalyst* | 223.1                                                | 30.4                                                   | 0.25                                                    | 0.015                                                   |
| Spent bifunctional catalyst  | 210.8                                                | 21.9                                                   | 0.24                                                    | 0.011                                                   |

<sup>a</sup> BET surface area.

<sup>b</sup> t-PLOT method for D<sub>p</sub> ≤ 2nm.

<sup>c</sup> Total pore volume, P/P<sub>0</sub> = 0.99.

\* The fresh catalyst was pre-reduced with same procedure in catalyst evaluation section

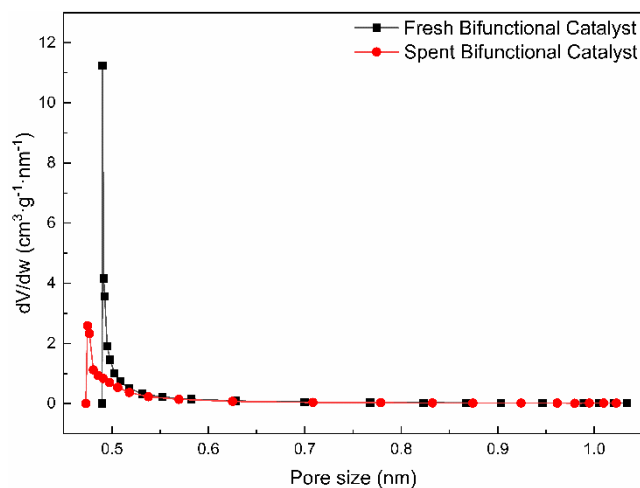

Figure S8 Pore size distribution of bifunctional catalysts from HK method. (The fresh catalyst was pre-reduced with same procedure in catalyst evaluation section)

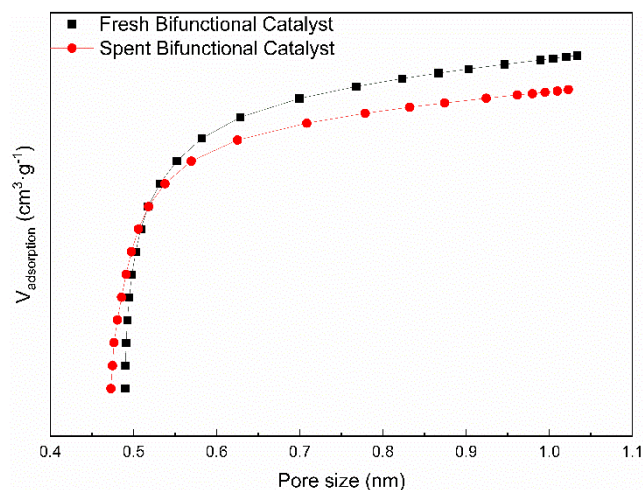

Figure S9 Cumulative Pore Volume (cm<sup>3</sup>·g<sup>-1</sup>) of bifunctional catalysts calculated from HK method. (The fresh catalyst was pre-reduced with same procedure in catalyst evaluation section)

## 2. Additional reaction results and products distribution

Table S8 reaction results of 6Mn4Zr/H-ZSM-5(60) with different intimacy

| Mixing method             | CO conversion | CO <sub>2</sub> selectivity | Hydrocarbon selectivity |                                         |                                       |                             |           |
|---------------------------|---------------|-----------------------------|-------------------------|-----------------------------------------|---------------------------------------|-----------------------------|-----------|
|                           |               |                             | Methane                 | C <sub>2</sub> -C <sub>4</sub> paraffin | C <sub>2</sub> -C <sub>4</sub> olefin | C <sub>5</sub> <sup>+</sup> | Aromatics |
| Layer mixing <sup>a</sup> | 4.43%         | 30.53%                      | 3.62%                   | 25.65%                                  | 6.51%                                 | 19.30%                      | 44.91%    |
| Granule mixing            | 11.55%        | 46.08%                      | 1.99%                   | 26.58%                                  | 2.57%                                 | 7.85%                       | 61.01%    |
| Powder mixing             | 15.11%        | 43.86%                      | 2.74%                   | 3.56%                                   | 3.26%                                 | 5.67%                       | 84.77%    |

Mass ratio of OX/ZEO = 1; reaction condition: 400 °C, 3 MPa, H<sub>2</sub>/CO = 2, space velocity = 3000 mL·g<sub>cat</sub><sup>-1</sup>·h<sup>-1</sup>.

<sup>a</sup> oxides in the up-stream, oxides and zeolites were separated by quartz wool.

Table S9 reaction results of 6Mn4Zr/H-ZSM-5 with different Si/Al ratio

| Si/Al ratio of H-ZSM-5 | CO conversion | CO <sub>2</sub> selectivity | Hydrocarbon selectivity |                                         |                                       |                             |           |
|------------------------|---------------|-----------------------------|-------------------------|-----------------------------------------|---------------------------------------|-----------------------------|-----------|
|                        |               |                             | Methane                 | C <sub>2</sub> -C <sub>4</sub> paraffin | C <sub>2</sub> -C <sub>4</sub> olefin | C <sub>5</sub> <sup>+</sup> | Aromatics |
| 30                     | 15.42%        | 39.47%                      | 4.90%                   | 9.79%                                   | 3.23%                                 | 4.03%                       | 78.05%    |
| 60                     | 15.11%        | 43.86%                      | 2.74%                   | 3.56%                                   | 3.26%                                 | 5.67%                       | 84.77%    |
| 120                    | 14.20%        | 42.73%                      | 3.45%                   | 4.46%                                   | 2.79%                                 | 7.46%                       | 81.85%    |
| 200                    | 14.04%        | 40.70%                      | 3.85%                   | 4.53%                                   | 3.56%                                 | 7.39%                       | 80.67%    |

Mixing method: powder mixing; Mass ratio of OX/ZEO = 1; reaction condition: 400 °C, 3 MPa, H<sub>2</sub>/CO = 2, space velocity = 3000 mL·g<sub>cat</sub><sup>-1</sup>·h<sup>-1</sup>.

Table S10 reaction results of 6Mn4Zr/H-ZSM-5(60) with different mass ratio

| Mass ratio | CO conversion | CO <sub>2</sub> selectivity | Hydrocarbon selectivity |                                         |                                       |                             |           |
|------------|---------------|-----------------------------|-------------------------|-----------------------------------------|---------------------------------------|-----------------------------|-----------|
|            |               |                             | Methane                 | C <sub>2</sub> -C <sub>4</sub> paraffin | C <sub>2</sub> -C <sub>4</sub> olefin | C <sub>5</sub> <sup>+</sup> | Aromatics |
| 1:2        | 12.44%        | 39.54%                      | 6.94%                   | 7.54%                                   | 1.38%                                 | 4.77%                       | 79.37%    |
| 1:1        | 15.11%        | 43.86%                      | 2.74%                   | 3.56%                                   | 3.26%                                 | 5.67%                       | 84.77%    |
| 1.5:1      | 14.61%        | 40.52%                      | 5.07%                   | 3.44%                                   | 2.03%                                 | 7.46%                       | 81.99%    |
| 2:1        | 12.08%        | 41.05%                      | 5.29%                   | 2.97%                                   | 2.78%                                 | 9.71%                       | 79.25%    |

Mixing method: powder mixing; reaction condition: 400 °C, 3 MPa, H<sub>2</sub>/CO = 2, space velocity = 3000 mL·g<sub>cat</sub><sup>-1</sup>·h<sup>-1</sup>.

Table S11 reaction results of 6Mn4Zr/H-ZSM-5(60) at different reaction condition

| Reaction Temperature (°C) | Reaction Pressure (MPa) | H <sub>2</sub> /CO ratio | Space Velocity (mL·g <sub>cat</sub> <sup>-1</sup> ·h <sup>-1</sup> ) | CO conversion | CO <sub>2</sub> selectivity | Hydrocarbon selectivity |                                         |                                       |                             |           |
|---------------------------|-------------------------|--------------------------|----------------------------------------------------------------------|---------------|-----------------------------|-------------------------|-----------------------------------------|---------------------------------------|-----------------------------|-----------|
|                           |                         |                          |                                                                      |               |                             | Methane                 | C <sub>2</sub> -C <sub>4</sub> paraffin | C <sub>2</sub> -C <sub>4</sub> olefin | C <sub>5</sub> <sup>+</sup> | Aromatics |
| 350                       |                         |                          |                                                                      | 6.58%         | 41.01%                      | 2.76%                   | 4.26%                                   | 1.47%                                 | 3.05%                       | 88.46%    |
| 375                       |                         |                          |                                                                      | 11.09%        | 40.55%                      | 2.73%                   | 4.05%                                   | 2.04%                                 | 5.08%                       | 86.10%    |
| 400                       | 3                       | 2                        | 3000                                                                 | 15.11%        | 43.86%                      | 2.74%                   | 4.56%                                   | 2.26%                                 | 5.67%                       | 84.77%    |
| 425                       |                         |                          |                                                                      | 19.08%        | 42.44%                      | 6.69%                   | 8.23%                                   | 5.56%                                 | 5.13%                       | 74.39%    |
| 450                       |                         |                          |                                                                      | 23.51%        | 40.66%                      | 15.39%                  | 15.00%                                  | 8.86%                                 | 6.22%                       | 54.53%    |
|                           | 1                       |                          |                                                                      | 6.28%         | 41.52%                      | 2.57%                   | 11.71%                                  | 3.65%                                 | 11.28%                      | 70.79%    |
|                           | 2                       |                          |                                                                      | 10.99%        | 41.42%                      | 4.21%                   | 4.42%                                   | 3.60%                                 | 6.29%                       | 81.47%    |
| 400                       | 3                       | 2                        | 3000                                                                 | 15.11%        | 43.86%                      | 2.74%                   | 4.56%                                   | 2.26%                                 | 5.67%                       | 84.77%    |
|                           | 4                       |                          |                                                                      | 22.27%        | 39.60%                      | 11.53%                  | 6.60%                                   | 2.26%                                 | 5.57%                       | 74.04%    |
|                           | 5                       |                          |                                                                      | 25.15%        | 41.57%                      | 12.07%                  | 6.93%                                   | 1.85%                                 | 6.62%                       | 72.53%    |
|                           |                         | 1                        |                                                                      | 12.86%        | 44.10%                      | 1.89%                   | 4.96%                                   | 1.07%                                 | 6.23%                       | 85.85%    |
|                           |                         | 2                        |                                                                      | 15.11%        | 43.86%                      | 2.74%                   | 4.56%                                   | 2.26%                                 | 5.67%                       | 84.77%    |
| 400                       | 3                       | 3                        | 3000                                                                 | 18.52%        | 36.28%                      | 3.22%                   | 11.71%                                  | 1.49%                                 | 6.73%                       | 76.85%    |
|                           |                         | 4                        |                                                                      | 19.84%        | 33.78%                      | 3.85%                   | 14.21%                                  | 1.48%                                 | 7.65%                       | 72.81%    |
|                           |                         |                          | 600                                                                  | 36.36%        | 41.86%                      | 3.15%                   | 5.02%                                   | 2.38%                                 | 2.21%                       | 87.24%    |
|                           |                         |                          | 1200                                                                 | 26.17%        | 42.09%                      | 2.72%                   | 4.45%                                   | 2.56%                                 | 2.76%                       | 87.51%    |
| 400                       | 3                       | 2                        | 1800                                                                 | 21.41%        | 42.56%                      | 2.55%                   | 4.46%                                   | 2.76%                                 | 2.86%                       | 87.37%    |
|                           |                         |                          | 2400                                                                 | 18.21%        | 42.10%                      | 2.45%                   | 4.85%                                   | 2.99%                                 | 3.61%                       | 86.10%    |
|                           |                         |                          | 3000                                                                 | 15.11%        | 43.86%                      | 2.74%                   | 3.56%                                   | 3.26%                                 | 5.67%                       | 84.77%    |

Mixing method: powder mixing; Mass ratio of OX/ZEO = 1.

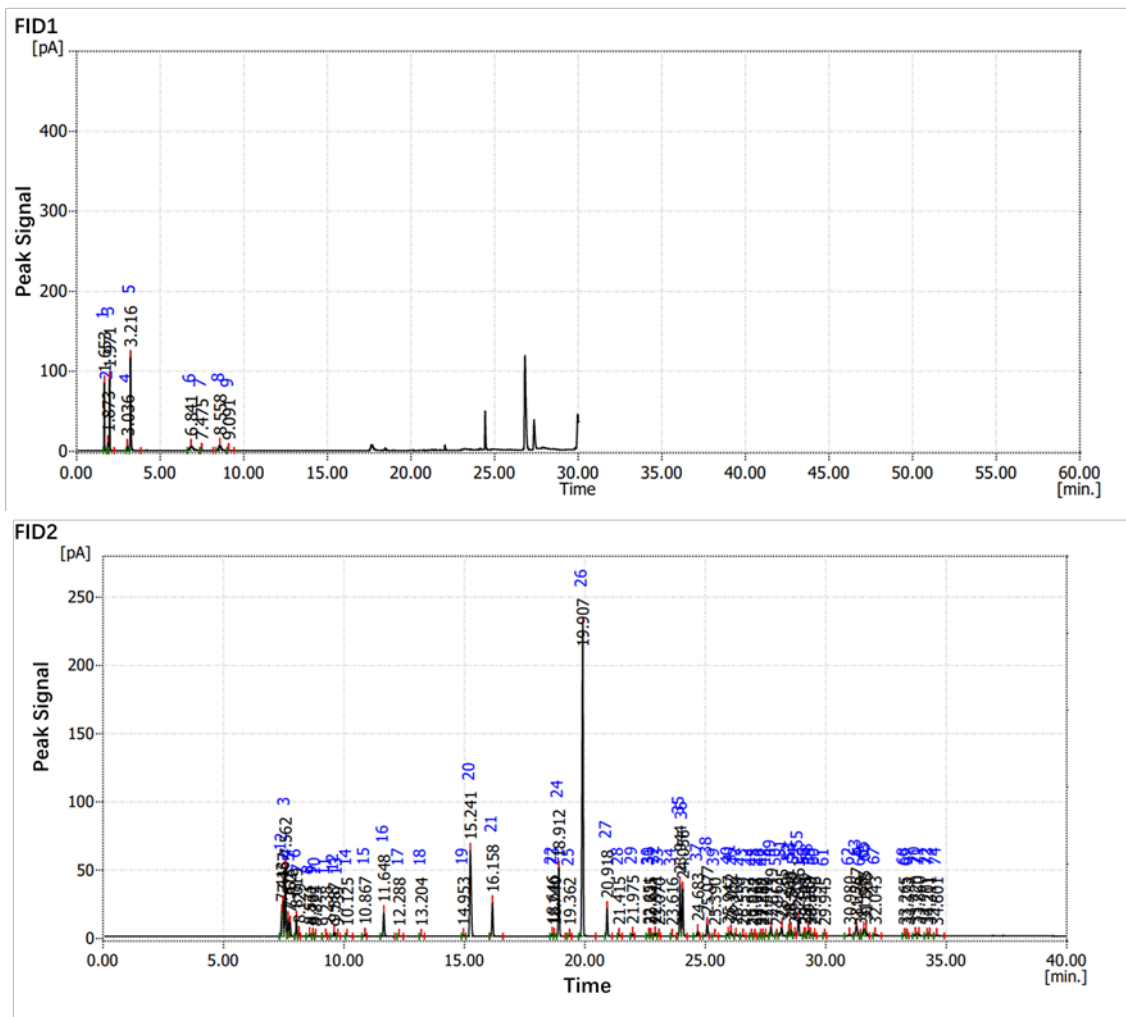

Figure S10 GC profile of organic products (obtained from t = 31 h in stability evaluation).

Qualitative analysis of peaks in figure S10:

For FID1, the peak from 1 to 9 is methane, ethylene, ethane, propylene, propane, n-butane, butene, i-butane, butene

For FID2, the aromatics product peaks were listed here, peak 12 is benzene (it was nearly covered by other peaks); peak 16 is toluene; Peak 20 is mixing peak of p-xylene and m-xylene; peak 21 is o-xylene; peak 24 is 1,3,5-trimethylbenzene; peak 26 is 1,2,4-trimethylbenzene; peak 27 is 1,2,3-trimethylbenzene; peak 35 and 36 is tetramethylbenzene; peak 37+ is heavy aromatics including naphthalene and methylnaphthalene etc.

Table S12 detailed products distribution (calculated from GC profile of figure S10)

| Light Hydrocarbons                       | Methane                                         | Ethylene                        | Ethane                          | Propylene        | Propane          | Butane             | butene             |                                           |
|------------------------------------------|-------------------------------------------------|---------------------------------|---------------------------------|------------------|------------------|--------------------|--------------------|-------------------------------------------|
|                                          | 2.33%                                           | 0.30%                           | 2.70%                           | 0.19%            | 5.61%            | 2.33%              | 0.08%              |                                           |
| C <sub>5</sub> <sup>+</sup> Hydrocarbons | C <sub>5</sub> -C <sub>6</sub><br>non-aromatics | C <sub>7</sub><br>non-aromatics | C <sub>8</sub><br>non-aromatics | Benzene          | Toluene          | Xylene             | trimethylbenzene   | C <sub>10</sub> <sup>+</sup><br>aromatics |
|                                          | 1.99%                                           | 0.27%                           | 1.28%                           | 0.37%<br>(0.45%) | 2.45%<br>(2.95%) | 14.79%<br>(17.84%) | 40.54%<br>(48.89%) | 24.77%<br>(29.87%)                        |

The aromatics distribution was listed in brackets.

### 3. Scheme for reaction mechanism over oxides

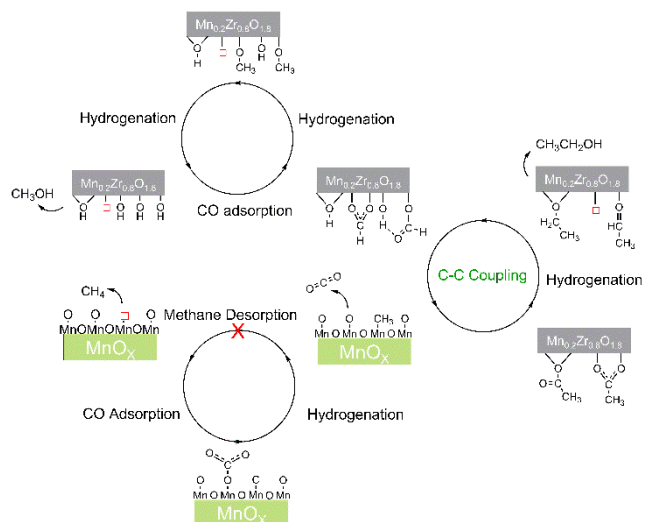

Scheme S1. Reaction mechanism of syngas conversion over 6Mn4Zr alone.



## Reference

1. Ouyang, F., et al., *Isotope-exchange reaction between hydrogen molecules and surface hydroxy groups on bare and modified ZrO<sub>2</sub>*. Journal of the Chemical Society, Faraday Transactions, 1996. **92**(22): p. 4491-4495.
2. Ochoa, J.V., et al., *In Situ DRIFTS-MS Study of the Anaerobic Oxidation of Ethanol over Spinel Mixed Oxides*. The Journal of Physical Chemistry C, 2013. **117**(45): p. 23908-23918.
3. Wang, X., et al., *Effects of surface acid–base properties of ZrO<sub>2</sub> on the direct synthesis of DMC from CO<sub>2</sub> and methanol: A combined DFT and experimental study*. Chemical Engineering Science, 2021. **229**: p. 116018.
4. Kalered, E., et al., *Infrared Fingerprints of the CO<sub>2</sub> Conversion into Methanol at Cu(s)/ZrO<sub>2</sub>(s): An Experimental and Theoretical Study*. ChemCatChem, 2023. **16**(3): p. e202300886.
5. Kattel, S., et al., *Optimizing Binding Energies of Key Intermediates for CO<sub>2</sub> Hydrogenation to Methanol over Oxide-Supported Copper*. J Am Chem Soc, 2016. **138**(38): p. 12440-50.
6. Li, J., et al., *Hollow cavity engineering of MOFs-derived hierarchical MnO<sub>x</sub> structure for highly efficient photothermal degradation of ethyl acetate under light irradiation*. Chemical Engineering Journal, 2023. **464**: p. 142412.
7. Qian, W., et al., *In Situ DRIFTS Study of Homologous Reaction of Methanol and Higher Alcohols Synthesis over Mn Promoted Cu–Fe Catalysts*. Industrial & Engineering Chemistry Research, 2019. **58**(16): p. 6288-6297.
8. Ouyang, F., et al., *Site Conversion of Methoxy Species on ZrO<sub>2</sub>*. The Journal of Physical Chemistry B, 1997. **101**(25): p. 4867-4869.
